# Supplementary material
Source: Springer Nature journal article supplement (https://www.springermedizin.de/resource/supplementary/12881_2006_192_MOESM4_ESM.pdf/9452616)

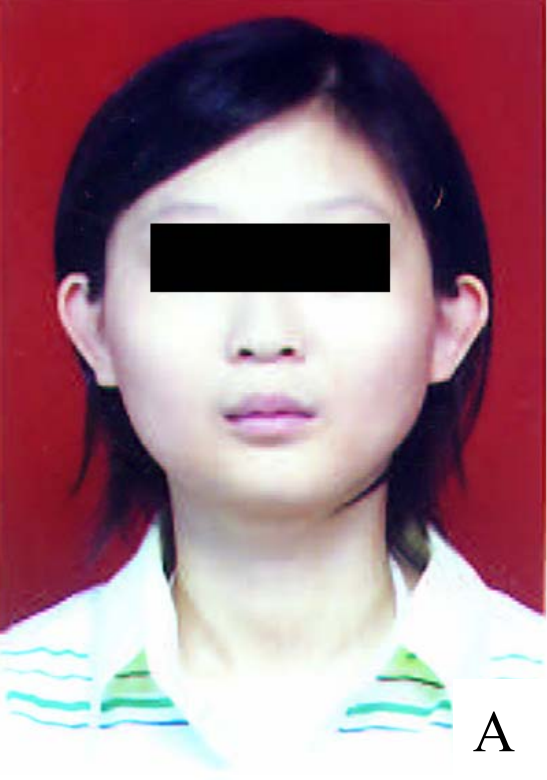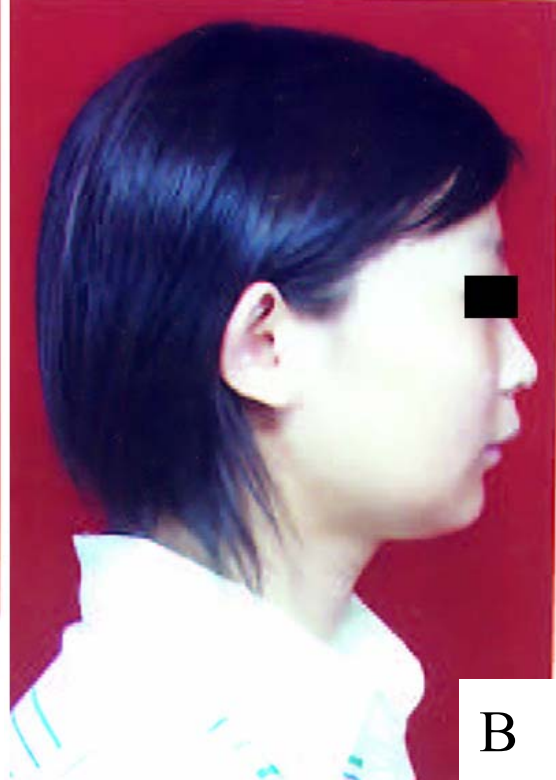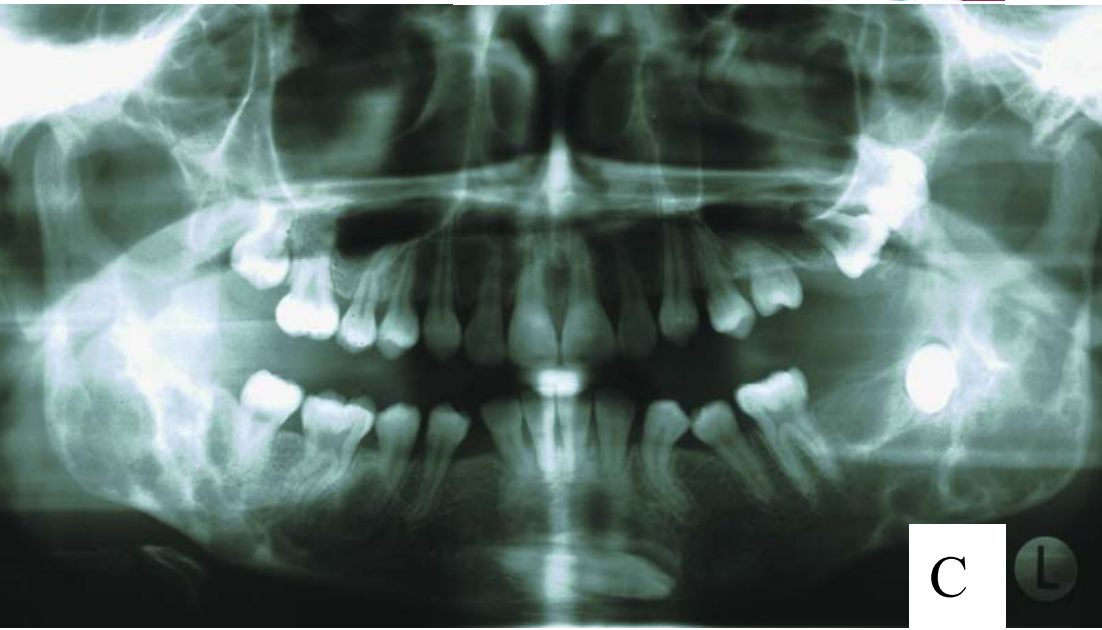

Supplement: MOESM4 [file 9452616]
